# Supplementary material for: Structural and Mechanistic Basis for the Inactivation of Human Ornithine Aminotransferase by (3S,4S)-3-Amino-4-fluorocyclopentenecarboxylic Acid
Source: MDPI journal article supplement (doi:10.3390/molecules28031133), 2023-01-23
Supplement: s1 [file s1]

## Supplementary Materials

### **Structural and Mechanistic Basis for the Inactivation of Human Ornithine Aminotransferase by (S)-3-Amino-(S)-4-fluorocyclopentenecarboxylic Acid**

*Sida Shen<sup>1,†</sup>, Arseniy Butrin<sup>2,†</sup>, Brett A. Beaupre<sup>2</sup>, Glaucio M. Ferreira<sup>4</sup>, Peter F. Doubleday<sup>3,‡</sup>,  
Daniel H. Grass<sup>1</sup>, Wei Zhu<sup>1</sup>, Neil L. Kelleher<sup>1,3</sup>, Graham R. Moran<sup>2</sup>, Dali Liu<sup>\*,2</sup>, and Richard B.  
Silverman<sup>\*,1,3,5</sup>*

<sup>1</sup>Department of Chemistry and Center for Developmental Therapeutics, Northwestern University, Evanston, Illinois 60208, United States

<sup>2</sup>Department of Chemistry and Biochemistry, Loyola University Chicago, Chicago, Illinois 60660, United States

<sup>3</sup>Department of Molecular Biosciences, Northwestern University, Evanston, Illinois 60208, United States

<sup>4</sup>Department of Clinical and Toxicological Analyses, School of Pharmaceutical Sciences, University of São Paulo, São Paulo, SP, 05508-000, Brazil

<sup>5</sup>Department of Pharmacology, Northwestern University, Chicago, Illinois, 60611, United States

<sup>†</sup>These authors contributed equally.

Corresponding authors:

\*(R.B.S.) E-mail: [r-silverman@northwestern.edu](mailto:r-silverman@northwestern.edu). Phone: +1-847-491-5653;

\*(D.L.) E-mail: [dliu@luc.edu](mailto:dliu@luc.edu). Phone: +1-773-508-3093.

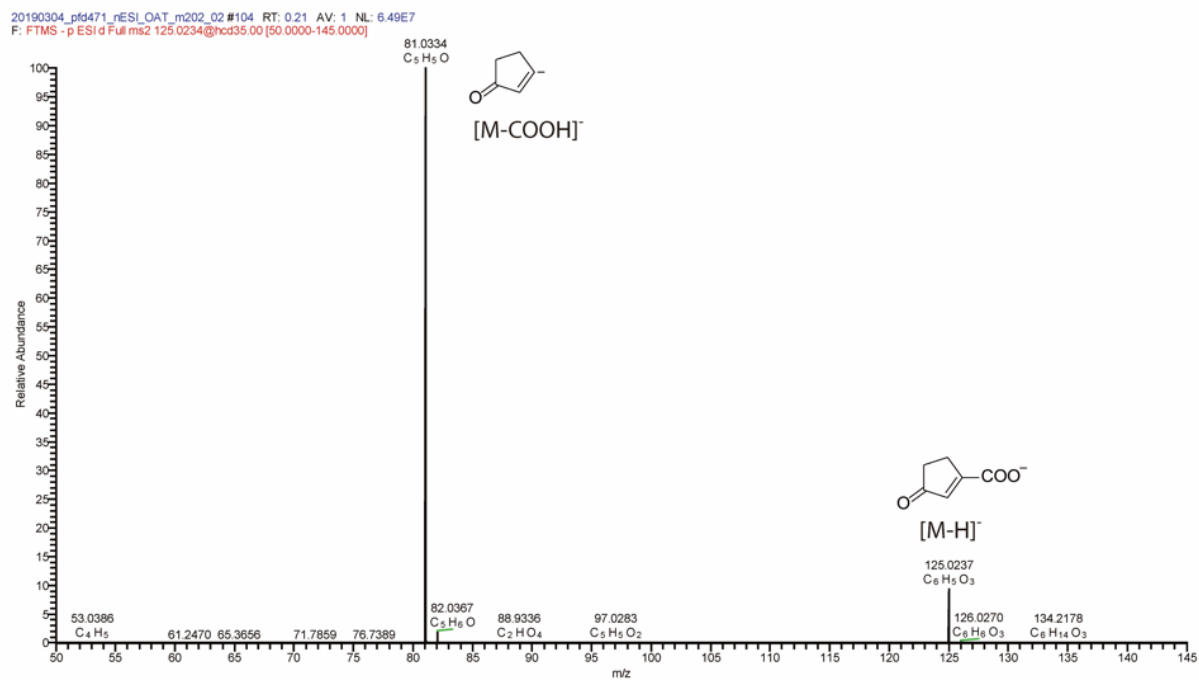

**Figure S1.** Primary metabolite **Met II** of **5** in *h*OAT (see Scheme 7)

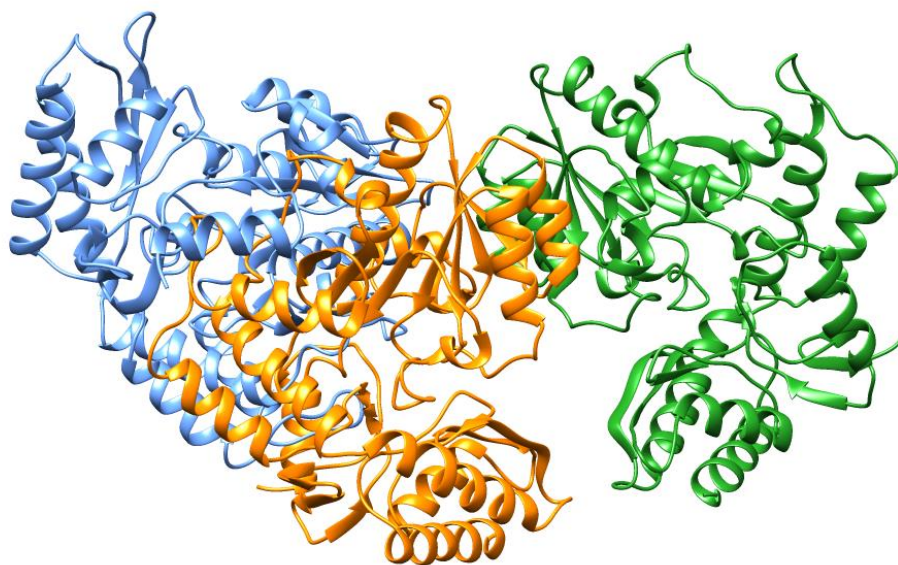

**Figure S2.** The asymmetric unit of the co-crystal structure of *hOAT* inactivated by **5**. The model contains three protein monomers, each monomer is shown in a different color.

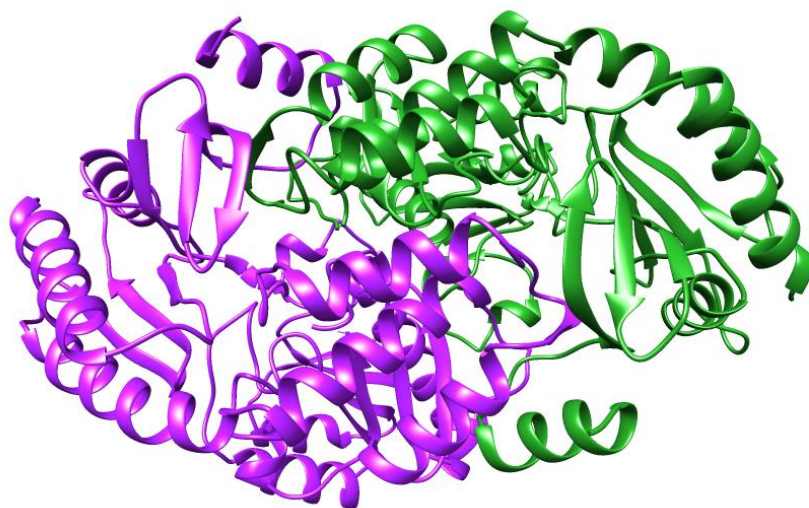

**Figure S3.** The biological assembly of *hOAT* represents a homodimer.

**Table S1.** Statistics of the crystal structures of *h*OAT inactivated by **5**

|                                             |                    |
|---------------------------------------------|--------------------|
| PDB code                                    | 8EZ1               |
| Space group                                 | C121               |
| <b>Cell dimension</b>                       |                    |
| $\alpha, \beta, \gamma$ (deg)               | 90, 103.7, 90      |
| a, b, c (Å)                                 | 202.2, 110.3, 57.1 |
| Processed Resolution (Å)                    | 1.91               |
| Rmerge <sup>b</sup> (%)                     | 18.5 (121.4)       |
| Rpim <sup>d</sup> (%)                       | 9.9 (67.3)         |
| I/ $\sigma$ (I)                             | 6.1 (1.1)          |
| CC <sub>1/2</sub> <sup>e</sup> (%)          | 99.2 (46.4)        |
| Completeness (%)                            | 98.0 (95.5)        |
| Multiplicity                                | 4.2 (4.1)          |
| No. Reflections                             | 391615             |
| No. Unique Reflections                      | 92197              |
| <b>Refinement</b>                           |                    |
| Rwork <sup>f</sup> / Rfree <sup>g</sup> (%) | 18.85/23.66        |
| No. of Atoms                                |                    |
| protein                                     | 9425               |
| ligand                                      | 81                 |
| water                                       | 707                |
| B factors (Å <sup>2</sup> )                 |                    |
| protein                                     | 37.00              |
| Ligand (copy A)                             | 25.48              |
| Ligand (copy B)                             | 29.94              |
| Ligand (copy C)                             | 41.72              |
| RMSD <sup>h</sup>                           |                    |
| bond lengths (Å)                            | 0.012              |
| bond angles (deg)                           | 1.12               |
| <b>Ramachandran plot (%)</b>                |                    |

|                                                                                                                                                                                                                                                                                                                                                                                                                                                                                                                                                                                                                                                                                                                   |       |
|-------------------------------------------------------------------------------------------------------------------------------------------------------------------------------------------------------------------------------------------------------------------------------------------------------------------------------------------------------------------------------------------------------------------------------------------------------------------------------------------------------------------------------------------------------------------------------------------------------------------------------------------------------------------------------------------------------------------|-------|
| avored                                                                                                                                                                                                                                                                                                                                                                                                                                                                                                                                                                                                                                                                                                            | 95.07 |
| allowed                                                                                                                                                                                                                                                                                                                                                                                                                                                                                                                                                                                                                                                                                                           | 4.59  |
| outliers                                                                                                                                                                                                                                                                                                                                                                                                                                                                                                                                                                                                                                                                                                          | 0.33  |
| <sup>a</sup> Provided Resolution at $I/\sigma = 2$ for conventional assessment of data quality<br><sup>b</sup> $R_{\text{merge}} = \Sigma  I_{\text{obs}} - I_{\text{avg}}  / \Sigma I_{\text{avg}}$<br><sup>c</sup> The values for the highest-resolution bin are in parentheses<br><sup>d</sup> Precision-indicating merging R<br><sup>e</sup> Pearson correlation coefficient of two “half” data sets<br><sup>f</sup> $R_{\text{work}} = \Sigma  F_{\text{obs}} - F_{\text{calc}}  / \Sigma F_{\text{obs}}$<br><sup>g</sup> Five percent of the reflection data were selected at random as a test set, and only these data were used to calculate $R_{\text{free}}$<br><sup>h</sup> Root-mean square deviation |       |
